# Supplementary material for: Catalysis with magnetically retrievable and recyclable nanoparticles layered with Pd(0) for C–C/C–O coupling in water
Source: Royal Society of Chemistry journal article supplement (doi:10.1039/c9ra10618a), 2020-01-01
Supplement: c9ra10618a1.pdf [file c9ra10618a1.pdf]

Electronic supplementary information (ESI†)  
**Catalysis with magnetically retrievable and recyclable nanoparticles  
layered with Pd(0) of C-C/C-O coupling in water**

Alpesh K. Sharma<sup>a</sup>, Hemant Joshi<sup>a,b</sup> and Ajai K. Singh<sup>a\*</sup>

<sup>a</sup>*Department of Chemistry, Indian Institute of Technology Delhi, New Delhi 110016, India.*

<sup>b</sup>*Present address: Department of Chemistry, School of Chemical Sciences and Pharmacy,  
Central University of Rajasthan, NH-8, Bandarsindri, Ajmer, Rajasthan 305817, India*

| <b>Table of contents</b>                                                                           | <b>Page No.</b> |
|----------------------------------------------------------------------------------------------------|-----------------|
| S1. Size distribution graph of $\text{Fe}_3\text{O}_4@\text{SiO}_2@\text{SePh}@Pd(0)$ NPs          | 3               |
| S2. SEM–EDX data of $\text{Fe}_3\text{O}_4@\text{SiO}_2@\text{SePh}@Pd(0)$ NPs                     | 3               |
| S3. SEM–EDX data of of recycled $\text{Fe}_3\text{O}_4@\text{SiO}_2@\text{SePh}@Pd(0)$ NPs         | 4               |
| S4. Size distribution graph of recycled $\text{Fe}_3\text{O}_4@\text{SiO}_2@\text{SePh}@Pd(0)$ NPs | 4               |
| S5. Comparison table with heterogeneous catalyst                                                   | 5               |
| S6. NMR spectral data of compounds                                                                 | 6-7             |
| S7. References                                                                                     | 7-8             |

## S1. Size distribution graph of $\text{Fe}_3\text{O}_4@\text{SiO}_2@\text{SePh}@\text{Pd}(0)$ NPs

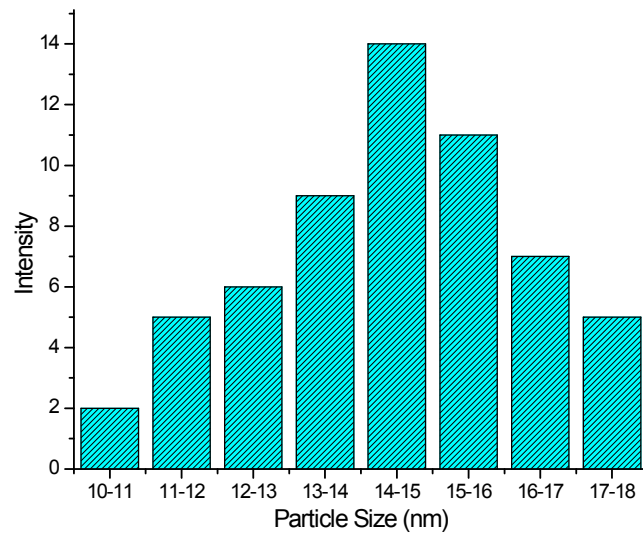

**Figure S1** Size distribution graph of  $\text{Fe}_3\text{O}_4@\text{SiO}_2@\text{SePh}@\text{Pd}(0)$  NPs.

## S2. SEM-EDX Data

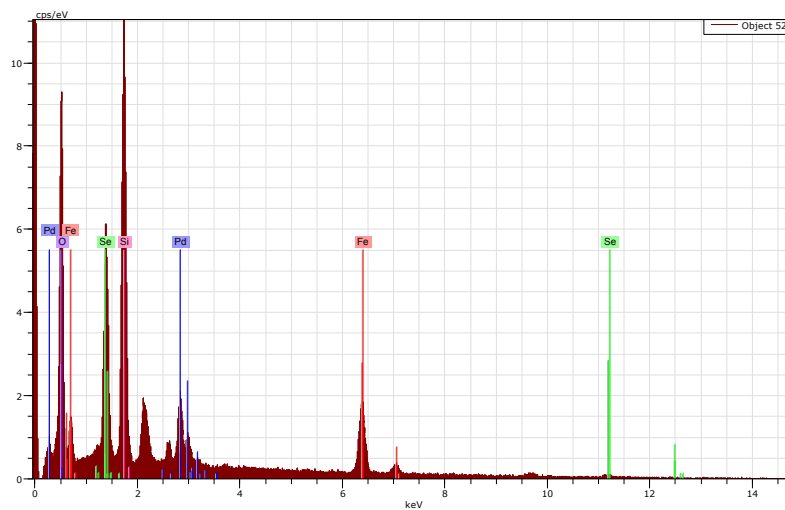

**Figure S2** SEM-EDX of  $\text{Fe}_3\text{O}_4@\text{SiO}_2@\text{SePh}@\text{Pd}(0)$  NPs.

### S3. SEM-EDX of recycled $\text{Fe}_3\text{O}_4@\text{SiO}_2@\text{SePh}@Pd(0)$ NPs

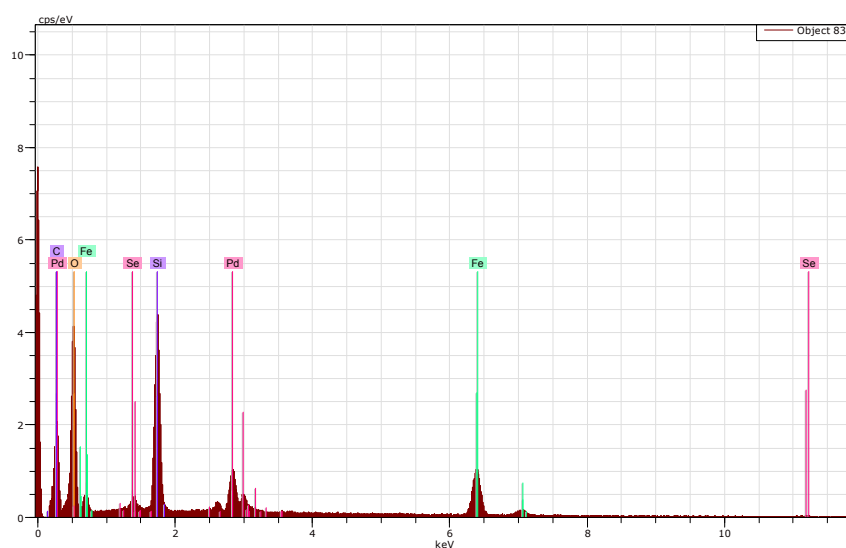

**Figure S3** SEM-EDX of recycled  $\text{Fe}_3\text{O}_4@\text{SiO}_2@\text{SePh}@Pd(0)$  NPs.

### S4. Size distribution graph of recycled $\text{Fe}_3\text{O}_4@\text{SiO}_2@\text{SePh}@Pd(0)$ NPs

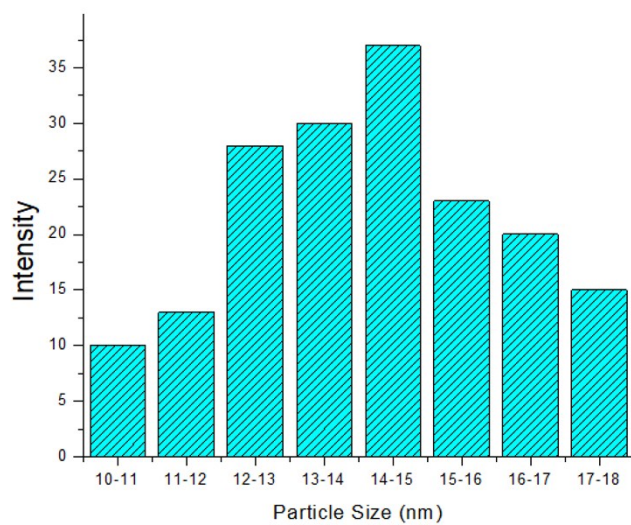

**Figure S4** Size distribution graph of recycled  $\text{Fe}_3\text{O}_4@\text{SiO}_2@\text{SePh}@Pd(0)$  NPs

## S5. Comparison table with heterogeneous catalyst

**Table S1:** Comparison table with heterogeneous catalysts reported in literature for C-O coupling reaction

| S. No | Catalyst                                                                               | Catalyst Loading | Time    | Solvent          | Substrate |
|-------|----------------------------------------------------------------------------------------|------------------|---------|------------------|-----------|
| 1     | Fe <sub>3</sub> O <sub>4</sub> @SiO <sub>2</sub> @SePh@Pd(0) NPs<br>(Present Catalyst) | 0.01-01 mol%     | 6 h     | H <sub>2</sub> O | ArCl/Br/I |
| 2     | Pd-ZnFe <sub>2</sub> O <sub>4</sub>                                                    | 10 mg,           | 4-5 h   | DMSO             | ArCl/Br/I |
| 3     | Fe <sub>3</sub> O <sub>4</sub> @SiO <sub>2</sub> @PPh <sub>2</sub> @Pd(0)              | 1.5 mol%,        | 1.5-7 h | H <sub>2</sub> O | ArCl/Br/I |
| 4     | Maghemite-copper nanocomposites                                                        | 4.7 mol%,        | 24 h    | DMF              | ArI       |
| 5     | NiFe <sub>2</sub> O <sub>4</sub>                                                       | 10 mol%,         | 10 h    | 1,4 Dioxane      | ArI       |
| 6     | CNT@ $\alpha$ -Fe <sub>2</sub> O <sub>3</sub> @CuO                                     | 1.85 mol%,       | 1-10 h  | DMF              | ArBr/I    |
| 7     | CuFe <sub>2</sub> O <sub>3</sub>                                                       | 10 mol%,         | 10-24 h | DMF              | ArBr/I    |

**Table S2:** Comparison table with heterogeneous catalyst reported in literature for SMC

| S.No     | Catalyst                                                                           | Catalyst Loading     | Time (h)   | Solvent                      | Substrate        |
|----------|------------------------------------------------------------------------------------|----------------------|------------|------------------------------|------------------|
| <b>1</b> | <b>Present Catalyst Fe<sub>3</sub>O<sub>4</sub>@SiO<sub>2</sub>@SePh@Pd(0) NPs</b> | <b>0.01-0.1 mol%</b> | <b>6 h</b> | <b>H<sub>2</sub>O</b>        | <b>ArBr/Cl/I</b> |
| 2        | Pd-Fe <sub>3</sub> O <sub>4</sub> heterodimer nanocrystals                         | 1 mol%,              | 24h        | DME:H <sub>2</sub> O         | ArBr/I           |
| 3        | Pd@Mag-MSN                                                                         | 1 mol%               | 6h         | 1,4 Dioxane                  | ArBr/I           |
| 4        | Pd-CoFe <sub>2</sub> O <sub>4</sub> MNPs                                           | 1.6 mol%             | 6-12 h     | Ethanol                      | ArBr/I           |
| 5        | iron oxide supported palladium NHC complex                                         | 7.3 mol%             | 12h        | DMF                          | ArBr/I           |
| 6        | NiFe <sub>2</sub> O <sub>4</sub> -(dopamine)-Pd                                    | 8.54 mol%            | 20-36h     | DMF                          | ArBr/Cl/I        |
| 7        | silica supported palladium catalyst                                                | 2-6 mol%             | 2h         | <i>O</i> -xylene             | ArBr             |
| 8        | Pd/C-cetyltrimethylammonium bromide (CTAB)                                         | 2.5 mol%             | 24h        | H <sub>2</sub> O             | ArBr/Cl/I        |
| 9        | layered double hydroxide (LDH) supported nanopalladium                             | 1 mol%               | 10h        | 1,4 Dioxane:H <sub>2</sub> O | ArCl             |
| 10       | Pd-polyoxomatalate nanoparticles                                                   | 1 mol%               | 12-16h     | EtOH:H <sub>2</sub> O        | ArBr/Cl          |

|                 |                                                                        |        |     |                      |         |
|-----------------|------------------------------------------------------------------------|--------|-----|----------------------|---------|
| 11 <sup>1</sup> | mercaptopropyl-modified mesoporous silica supported palladium catalyst | 1 mol% | 24h | DMF:H <sub>2</sub> O | ArBr/Cl |
|-----------------|------------------------------------------------------------------------|--------|-----|----------------------|---------|

## S6. NMR spectral data of compounds

### NMR Data of products of C-O coupling reaction-

**4-phenoxybenzaldehyde:**<sup>1</sup> Yellow liquid. <sup>1</sup>H NMR (300 MHz, CDCl<sub>3</sub>, 25°C vs Me<sub>4</sub>Si):  $\delta$  (ppm): 9.92 (s, 1H), 7.84-7.86 (d, 2H), 7.40-7.45 (t, 2H), 7.20-7.26 (m, 1H), 7.05-7.11 (t, 4H).

**4-phenoxybenzotrile:**<sup>1</sup> White Solid. <sup>1</sup>H NMR (300 MHz, CDCl<sub>3</sub>, 25°C vs Me<sub>4</sub>Si): 7.49-7.55 (m, 2H), 7.30-7.35 (t, 2H), 7.11-7.17 (t, 1H), 6.96-6.98 (d, 2H), 6.90-6.93(d, 2H).

**1-Nitro-4-phenoxybenzene:**<sup>2</sup> Yellow Solid. <sup>1</sup>H NMR (300 MHz, CDCl<sub>3</sub>, 25°C vs Me<sub>4</sub>Si): 8.11-8.14 (d, 2H), 7.34-7.40 (t, 2H), 7.16-7.21 (t, 1H), 7.01-7.03 (d, 2H), 6.92-6.95 (d, 2H).

**1-(4-phenoxyphenyl)ethanone:**<sup>1</sup> White Solid. <sup>1</sup>H NMR (300 MHz, CDCl<sub>3</sub>, 25°C vs Me<sub>4</sub>Si): 7.91-7.96 (d, 2H), 7.36-7.42 (t, 2H), 7.19-7.22 (t, 1H), 7.06-7.08 (d, 2H), 6.97-7.02 (d, 2H), 2.57 (s, 3H).

**2-phenoxybenzaldehyde:**<sup>1</sup> Yellow liquid. <sup>1</sup>H NMR (300 MHz, CDCl<sub>3</sub>, 25°C vs Me<sub>4</sub>Si): 10.45 (s, 1H), 7.85-7.88 (d, 1H), 7.41-7.47 (t, 1H), 7.30-7.35 (t, 2H), 7.10-7.14 (t, 2H), 6.98-7.01 (d, 2H), 6.81-6.84 (d, 1H).

**1-(2-phenoxyphenyl)ethanone:**<sup>2</sup> Colorless oil. <sup>1</sup>H NMR (300 MHz, CDCl<sub>3</sub>, 25°C vs Me<sub>4</sub>Si): 7.83-7.86 (d, 1H), 7.35-7.45 (m, 3H), 7.15-7.20 (m, 2H), 7.01-7.03 (d, 2H) 6.90-6.92 (d, 2H) 2.64 (s, 3H).

**Diphenyl ether:**<sup>2</sup> Colorless liquid. <sup>1</sup>H NMR(300 MHz, CDCl<sub>3</sub>, 25°C vs Me<sub>4</sub>Si): 7.24-7.28 (t, 4H), 7.02-7.05 (t, 2H), 6.93- 6.95 (d, 4H).

**1-Methyl-4-phenoxybenzene:**<sup>2</sup> Colorless liquid. <sup>1</sup>H NMR (300 MHz, CDCl<sub>3</sub>, 25°C vs Me<sub>4</sub>Si): 7.46-7.48 (m, 2H), 7.23-7.26 (t, 2H), 7.06- 7.07 (m, 1H), 6.98-7.04 (m, 2H), 6.89-6.91 (m, 2H), 2.26 (s, 3H).

**1-Methoxy-4-phenoxybenzene:**<sup>3</sup> Colorless liquid. 1H NMR (300 MHz, CDCl<sub>3</sub>, 25°C vs Me<sub>4</sub>Si): 7.25-7.32 (m, 2H), 7.01-7.06 (t, 1H), 6.93- 7.01 (m, 4H), 6.86-6.90 (m, 2H), 3.81 (s, 3H).

### NMR Data of products of Suzuki-Miyaura coupling reaction-

**4-Phenylbenzaldehyde:**<sup>4</sup> Light yellow solid. <sup>1</sup>H NMR (300 MHz, CDCl<sub>3</sub>, 25°C vs Me<sub>4</sub>Si): δ 10.06 (s, 1H), 7.95 (d, J = 8.4 Hz, 2H), 7.75 (d, J = 8.4 Hz, 2H), 7.63–7.65 (m, 2H), 7.39–7.51 (m, 3H). 1

**4-Phenylbenzotrile:**<sup>5</sup> Pale yellow solid. <sup>1</sup>H NMR (300 MHz, CDCl<sub>3</sub>, 25°C vs Me<sub>4</sub>Si): δ 7.54–7.61 (m, 4H), 7.49–7.52 (m, 2H), 7.34–7.45 (m, 3H).

**4-Nitrobiphenyl:**<sup>6</sup> Pale yellow solid. <sup>1</sup>H NMR (300 MHz, CDCl<sub>3</sub>, 25°C vs Me<sub>4</sub>Si): δ 8.27 (d, J = 9.0 Hz, 2H), 7.71 (d, J = 9.0 Hz, 2H), 7.61 (d, J = 8.4 Hz, 2H), 7.41–7.51 (m, 3H).

**4-Acetylbiphenyl:**<sup>6</sup> White solid. <sup>1</sup>H NMR (300 MHz, CDCl<sub>3</sub>, 25°C vs Me<sub>4</sub>Si): δ 8.02 (d, J = 8.4 Hz, 2H), 7.60–7.68 (m, 4H), 7.38–7.48 (m, 3H), δ 2.62 (s, 3H).

**Biphenyl:**<sup>6</sup> White solid: <sup>1</sup>H NMR (300 MHz, CDCl<sub>3</sub>, 25°C vs Me<sub>4</sub>Si): 7.58 (d, J = 6.9 Hz, 4H), 7.42 (t, J = 7.5 Hz, 4H), δ 7.33 (t, J = 7.5 Hz, 2H).

**4-Methylbiphenyl:**<sup>6</sup> Colorless solid. <sup>1</sup>H NMR (300 MHz, CDCl<sub>3</sub>, 25°C vs Me<sub>4</sub>Si): 7.55–7.58 (m, 2H), 7.48 (d, J = 8.1 Hz, 2H), 7.38–7.42 (m, 2H), 7.27–7.32 (m, 1H), 7.23 (d, J = 7.8 Hz, 2H), δ 2.37 (s, 3H).

**4-Methoxybiphenyl:**<sup>6,7</sup> White solid. <sup>1</sup>H NMR (300 MHz, CDCl<sub>3</sub>, 25°C vs Me<sub>4</sub>Si): 7.50–7.55 (m, 4H), 7.40 (t, J = 7.2 Hz, 2H), 7.28–7.31 (m, 1H), 6.96 (d, J = 8.4 Hz, 2H), δ 3.82 (s, 3H).

**4-Phenylpyridine:**<sup>8</sup> Brown solid. <sup>1</sup>H NMR (300 MHz, CDCl<sub>3</sub>, 25°C vs Me<sub>4</sub>Si): 8.65 (d, J = 5.4 Hz, 2H), 7.62 (d, J = 8.1 Hz, 2H), δ 7.40–7.50 (m, 5H).

**2-Phenylpyridine:**<sup>8</sup> Colourless liquid; <sup>1</sup>H NMR (300 MHz, CDCl<sub>3</sub>, 25°C vs Me<sub>4</sub>Si) δ 8.70 (s, 1H), 8.00 (d, J = 7.0 Hz, 2H), 7.74 (s, 2H), 7.55–7.38 (m, 4H), 7.24 (d, J = 6.4 Hz, 1H);

## S7. References

- 1 T. Hu, T. Schulz, C. Torborg, X. Chen, J. Wang, M. Beller, J. Huang, *Chem. Commun.*, 2009, 7330.
- 2 Q. Zhang, D. Wang, X. Wang, K. Ding, *J. Org. Chem.*, 2009, **74**, 7187.
- 3 H. Joshi, K. N. Sharma, A. K. Sharma, O. Prakash and A. K. Singh, *Chem. Commun.*, 2013, **49**, 7483.
- 4 R. K. Arvela, N. E. Leadbeater, *Org. Lett.* 2005, **7**, 2101.
- 5 B. Tao, D. W. Boykin, *J. Org. Chem.* 2004, **69**, 4330.

- 6 G. M. Scheuermann, L. Rumi, P. Steurer, W. Bannwarth, R. Mulhaupt, *J. Am. Chem. Soc.* 2009, **131**, 8262.
- 7 B. V. Martinez, A. G. de Viedma, C. Burgos, B. J. Alvarez, *Org. Lett.*, 2000, **2**, 3933.
- 8 S. Doherty, J. G. Knight, J. P. McGrady, A. M. Ferguson, N. A. B. Ward, R. W. Harrington, W. Clegg, *Adv. Synth. Catal.* 2010, **352**, 201.
